# Supplementary material for: Ambipolar charge transport in a bis-diketopyrrolopyrrole small molecule semiconductor with tunable energetic disorder
Source: Royal Society of Chemistry journal article supplement (doi:10.1039/c7cp07708d), 2017-12-11
Supplement: c7cp07708d1.pdf [file c7cp07708d1.pdf]

Supplementary information

## **Ambipolar Charge Transport in a Bis-Diketopyrrolopyrrole Small Molecule Semiconductor with Tunable Energetic Disorder**

*Jiyu Zhou, Shiqing Bi, Yang Shuo, Huiqiong Zhou,\* and Yuan Zhang\**

### **Experimental methods**

*Materials:* BTDPP2 was obtained via lab synthesis. All other materials are purchased without further purification. Detailed synthetic procedures for BTDPP2 are described in ref 22.

*Device fabrication and characterization.* OFETs were fabricated in a nitrogen purged glove box. The active layers were deposited by spin-coating the BTDPP2 solution from chloroform (6 mg/mL) on pre-cleaned Si/SiO<sub>2</sub> substrates (oxide layer of 150 nm) followed by thermal evaporation of 100 nm Au top contact through shadow masks, yielding a channel width of 2 mm and a channel length of 40 μm. The finished devices were thermally annealed on a hot plate at selected temperatures and immediately cooled down at ambient glove box temperature before testing. The thickness of BTDPP2 active layers was around 40 nm determined by a profilometer.

BTDPP2 electron-only (EO) diodes were fabricated as follows: First, patterned bottom Al anode (30 nm) was constructed by thermal evaporation on pre-cleaned glass substrates. BTDPP2 was spun-coat from the chloroform solution (18 mg/mL) on top of the glass substrate containing Al anode, leading to a film thickness of ~150 nm. Prior to depositing the top electrode, the cast films were thermally annealed at 150 °C for 10 min

and cooled in the glove box. Finally, 5 nm of Ba cathode was thermally evaporated on top of the BTDPP2 active layer capped with 100 nm of Al protection layer. The evaporation was performed under a chamber pressure  $< 1 \times 10^{-7}$  Torr. Similarly, the OFETs were pre-annealed at the same temperatures prior to depositing the Ba/Al electrode. Completed OFET and diode devices were transferred in a LakeShore vacuum probe station (pressure  $< 10^{-6}$  Torr) without exposure to air. The electronic characteristics were registered by a Keithley 4200 SC semiconductor parameter analyzer. Low temperature was achieved by purging with liquid nitrogen in a cryosystem controlled by a LakeShore temperature controller.

*Data simulation.* Data analysis and modeling of OFETs characteristics were performed by using OriginPro (version 8.5) data analysis software embedded with customized programming codes.

### **Mobility calculation and OFET characteristics simulation**

Based on the classical metal-oxide-semiconductor (MOS) theories, the OFET mobility in the linear and saturation regimes can be calculated by,

$$\mu_{lin}(FET) = \frac{L}{WC_i V_d} \left. \frac{\partial I_d}{\partial V_g} \right|_{V_g - V_{th} \gg V_d} \quad (S1)$$

$$\mu_{sat}(FET) = \frac{2L}{WC_i} \left( \left. \frac{\partial \sqrt{I_d}}{\partial V_g} \right)^2 \right|_{V_g - V_{th} \ll V_d} \quad (S2)$$

where  $W$ ,  $L$ ,  $C_i$  is the FET channel width, length and area capacitance of the oxide layer, respectively.

With the charge transport in BTDPP2 characteristic of the phonon-assisted hopping process, the carrier mobility follows the general Arrhenius temperature ( $T$ ) dependence from which the activation energy  $\Delta_{mobility}$  can be calculated as,

$$\mu(e, h) = \mu_0(e, h) \exp\left(-\frac{\Delta_{mobility}}{T}\right) \quad (S3)$$

where  $\mu_0(e, h)$  is the zero-field mobility with “ $e$ ” and “ $h$ ” in the parenthesis denoting for the electron and hole.

Based on the VRH model, the  $I_{ds}$  of OFETs operated in the saturation regime can be analytically described by,

$$I_{ds} = \frac{W}{L} \left( \gamma_e \frac{T}{2T_{0,e}} \frac{T}{2T_{0,e} - T} (V_g - V_t)^{T_{0,e}/T} + \gamma_h \frac{T}{2T_{0,h}} \frac{T}{2T_{0,h} - T} (-V_g + V_t + V_d)^{T_{0,h}/T} \right) \quad (S4a)$$

where the subscripts “ $e$ ” and “ $h$ ” denote for the electron or hole, and  $\gamma$  equals,

$$\gamma = \frac{\sigma_0}{q} \left( \frac{\left(\frac{T_0}{T}\right)^4 \sin\left(\pi \frac{T}{T_0}\right)}{(2\alpha)^3 B_c} \right)^{T_0/T} \left( \frac{1}{2k_B T_0 \epsilon_0 \epsilon_r} \right)^{(T_0/T)-1} C_i^{(2T_0/T-1)} \quad (S4b)$$

with  $\sigma_0$  standing for the conductivity prefactor,  $\alpha^{-1}$  for the overlap between localized states,  $B_c$  for the critical number of the onset of percolation, and  $\epsilon_0 \epsilon_r$  for the dielectric constant of the semiconductor.

Similar to Equation S4, the output and transfer characteristics in the linear regime is described by,

$$I_{SD} = \gamma \frac{W}{L} \frac{T}{2T_0} \frac{T}{2T_0 - T} \left[ (V_g - V_t)^{T_0/T} - (V_g - V_t - V_d)^{T_0/T} \right] \quad (S5a)$$

$$\gamma = \frac{\sigma_0}{q} \left( \frac{\left( \frac{T_0}{T} \right)^4 \sin\left( \pi \frac{T}{T_0} \right)}{(2\alpha)^3 B_c} \right)^{T_0/T} \left( \frac{1}{2k_B T_0 \epsilon_0 \epsilon_r} \right)^{(T_0/T)-1} C_i^{(2T_0/T-1)} \quad (S5b)$$

By re-writing Equation S4, the density dependent FET mobility as a function of  $V_g$  is given by,

$$\mu_{FET}(V_{eff}) = \frac{\sigma_0}{q} \left( \frac{\left( \frac{T_0}{T} \right)^4 \sin\left( \pi \frac{T}{T_0} \right)}{(2\alpha)^3 B_c} \right)^{T_0/T} \left( \frac{(C_i V_{eff})}{2k_B T_0 \epsilon_0 \epsilon_r} \right)^{(T_0/T)-1} = \frac{\gamma}{C_i} (V_{eff})^{T_0/T-2} \quad (S6)$$

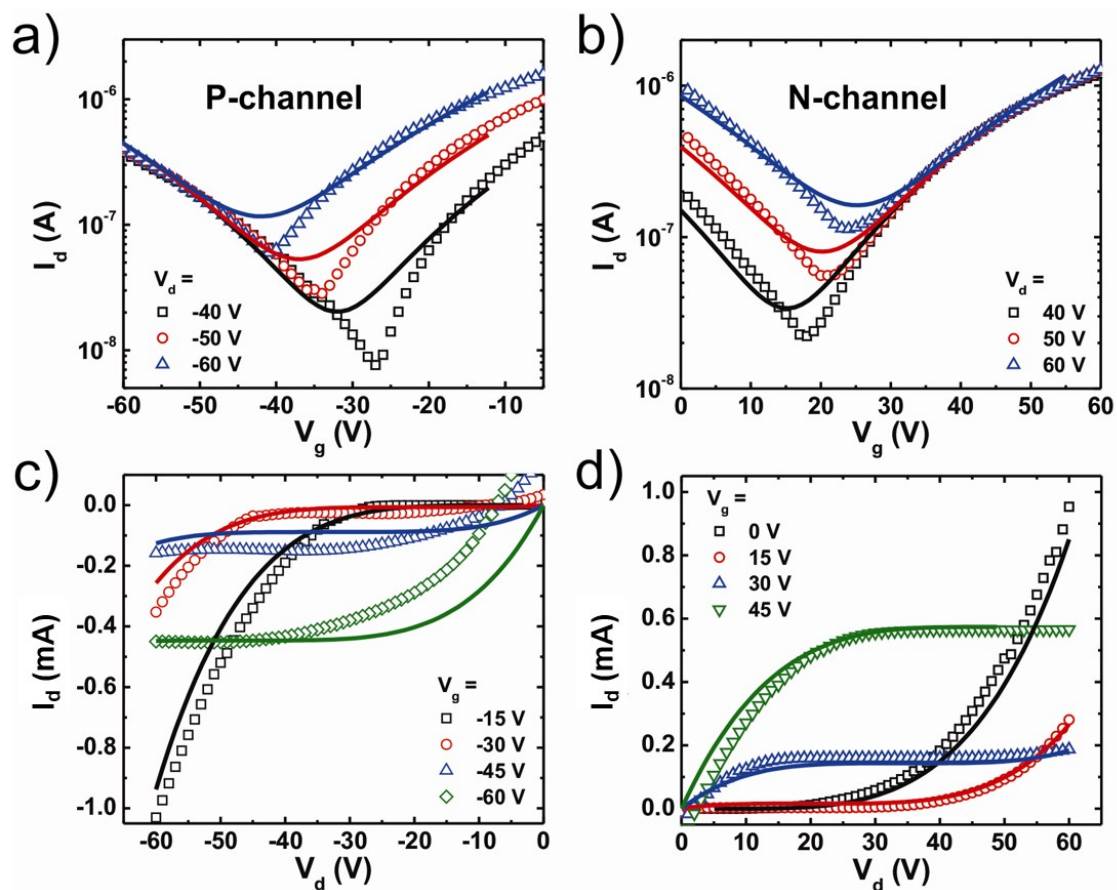

**Figure S1.** (a), (b) Transfer, and (c), (d) output characteristics of BTDP2 OFETs with Au source-drain electrodes at room temperature when operated in the  $p$ -type (a, c) and  $n$ -type (b, d) modes, respectively. Also shown by lines are the simulations based the VRH model using Equations S4-S5 (S1) with taking into account the density-dependent mobility.

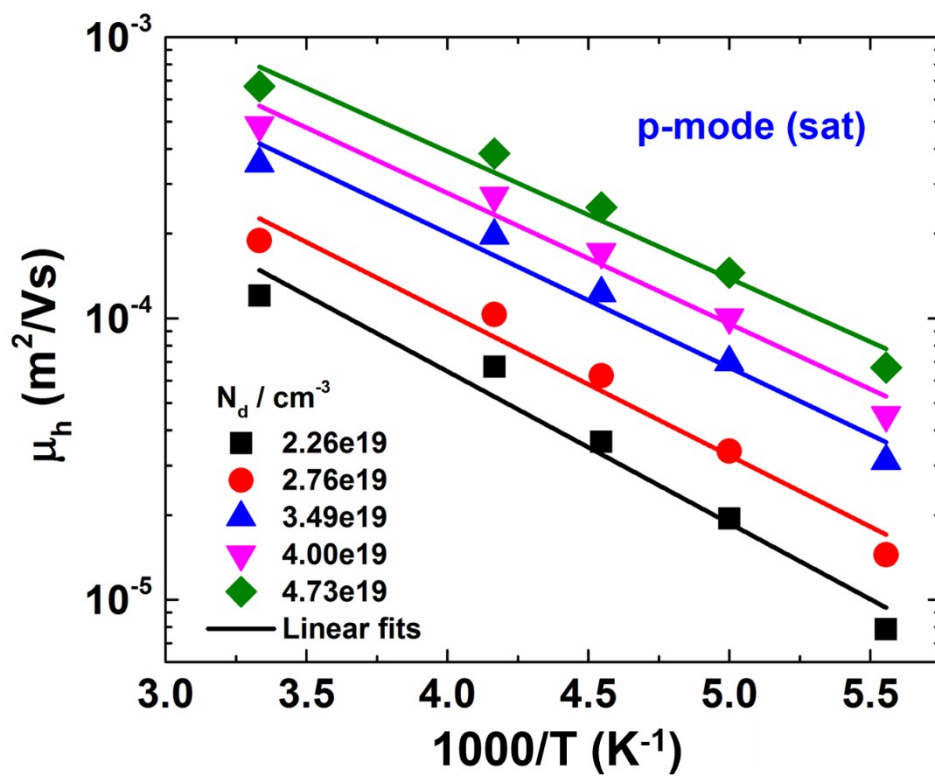

**Figure S2.** Temperature ( $T$ )-dependent hole mobility in BTDP2 OFETs with Au source-drain electrodes at various carrier densities calculated in the saturation regime. Lines are the linear fittings to calculations.

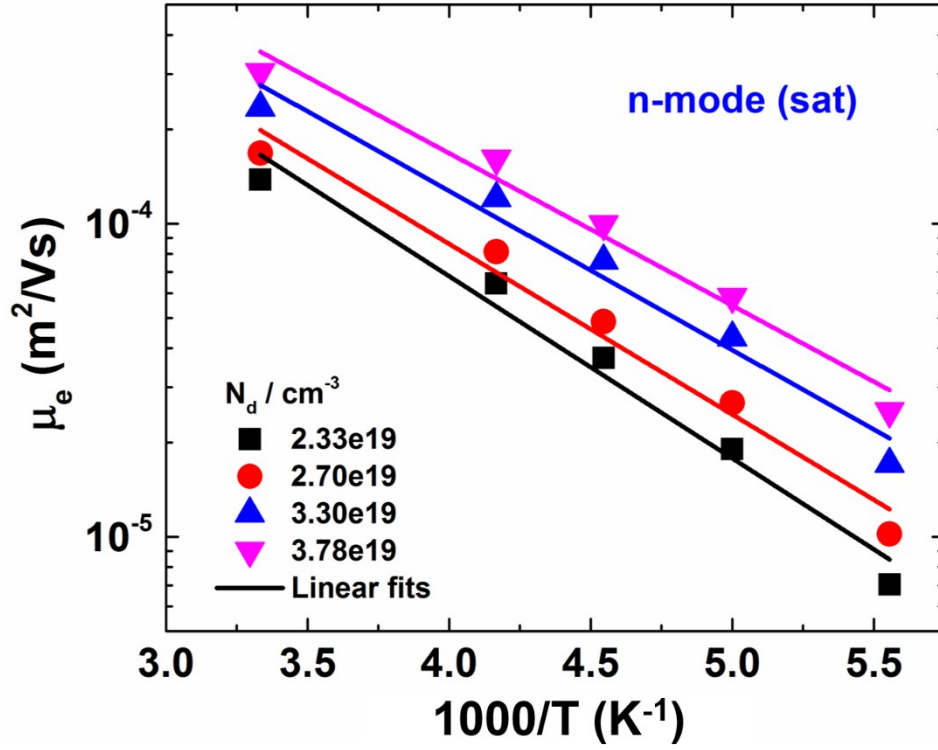

**Figure S3.**  $T$ -dependent electron mobility in BTDDPP2 OFETs with Au source-drain electrodes at various carrier densities calculated in the saturation regime. Lines are the linear fittings to calculations.

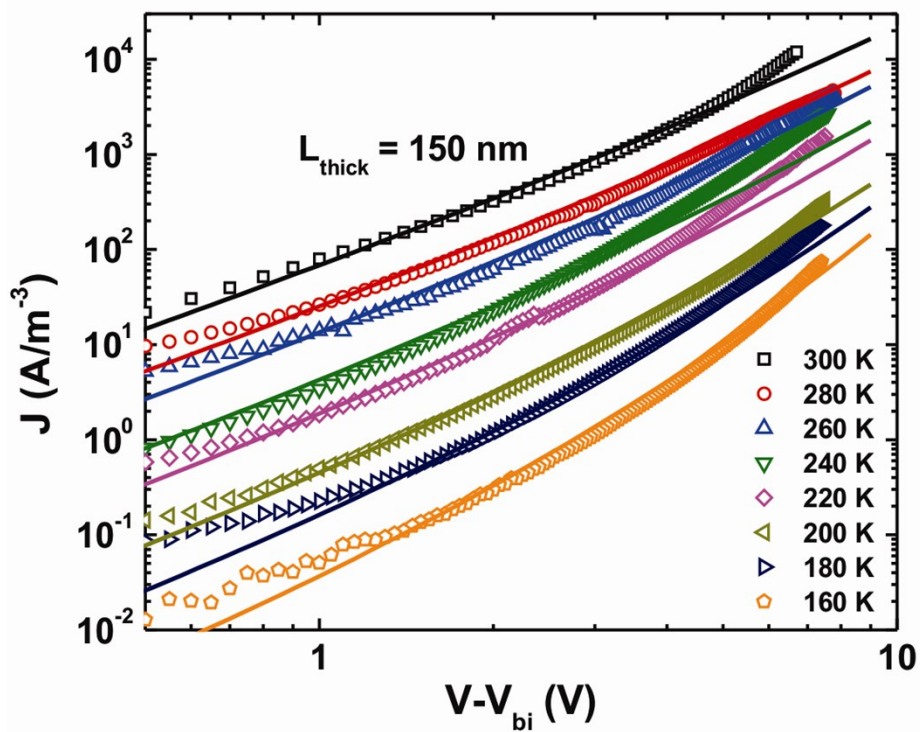

**Figure S4.** Current density versus voltage characteristics of BTDPP electron-only diodes measured at various temperatures. Lines are the fittings to measurements with the space-charge limited current model (Mott-Gurney Law).
